# Supplementary material for: Hydrogen bonded-extended lanthanide coordination polymers decorated with 2,3-thiophenedicarboxylate and oxalate: synthesis, structures, and properties
Source: Royal Society of Chemistry journal article supplement (doi:10.1039/c4ce01734j), 2014-01-01

**Hydrogen bonded-extended lanthanide coordination  
polymers decorated with 2,3-thiophenedicarboxylate  
and oxalate: synthesis, structures, and properties**

**Table S1** Crystal data and structure refinements for 1–5

| Compounds                                                                                                           | 1                                                                                                                                                                                                                                                                                                                                                                                                          | 2             | 3             | 4             | 5             |
|---------------------------------------------------------------------------------------------------------------------|------------------------------------------------------------------------------------------------------------------------------------------------------------------------------------------------------------------------------------------------------------------------------------------------------------------------------------------------------------------------------------------------------------|---------------|---------------|---------------|---------------|
| Formula                                                                                                             | C <sub>14</sub> H <sub>14</sub> O <sub>17</sub> S <sub>2</sub> Nd <sub>2</sub> C <sub>14</sub> H <sub>14</sub> O <sub>17</sub> S <sub>2</sub> Eu <sub>2</sub> C <sub>14</sub> H <sub>14</sub> O <sub>17</sub> S <sub>2</sub> Gd <sub>2</sub> C <sub>14</sub> H <sub>14</sub> O <sub>17</sub> S <sub>2</sub> Tb <sub>2</sub> C <sub>14</sub> H <sub>14</sub> O <sub>17</sub> S <sub>2</sub> Ho <sub>2</sub> |               |               |               |               |
| Formula weight                                                                                                      | 806.85                                                                                                                                                                                                                                                                                                                                                                                                     | 822.29        | 832.87        | 836.21        | 848.23        |
| Crystal system                                                                                                      | Monoclinic                                                                                                                                                                                                                                                                                                                                                                                                 | Monoclinic    | Monoclinic    | Monoclinic    | Monoclinic    |
| space group                                                                                                         | C2/c                                                                                                                                                                                                                                                                                                                                                                                                       | C2/c          | C2/c          | C2/c          | C2/c          |
| <i>a</i> /Å                                                                                                         | 19.965(3)                                                                                                                                                                                                                                                                                                                                                                                                  | 19.746(6)     | 19.671(4)     | 19.621(3)     | 19.489(5)     |
| <i>b</i> /Å                                                                                                         | 6.1120(10)                                                                                                                                                                                                                                                                                                                                                                                                 | 6.0662(19)    | 6.0556(13)    | 6.0421(9)     | 6.0107(16)    |
| <i>c</i> /Å                                                                                                         | 19.828(3)                                                                                                                                                                                                                                                                                                                                                                                                  | 19.785(6)     | 19.793(4)     | 19.795(3)     | 19.762(5)     |
| $\alpha$ /°                                                                                                         | 90.00                                                                                                                                                                                                                                                                                                                                                                                                      | 90.00         | 90.00         | 90.00         | 90.00         |
| $\beta$ /°                                                                                                          | 111.194(2)                                                                                                                                                                                                                                                                                                                                                                                                 | 111.051(3)    | 111.098(2)    | 111.0900(10)  | 111.257(2)    |
| $\gamma$ /°                                                                                                         | 90.00                                                                                                                                                                                                                                                                                                                                                                                                      | 90.00         | 90.00         | 90.00         | 90.00         |
| <i>V</i> /Å <sup>3</sup>                                                                                            | 2255.9(6)                                                                                                                                                                                                                                                                                                                                                                                                  | 2211.7(12)    | 2199.7(8)     | 2189.5(6)     | 2157.5(10)    |
| <i>Z</i>                                                                                                            | 4                                                                                                                                                                                                                                                                                                                                                                                                          | 4             | 4             | 4             | 4             |
| <i>D<sub>c</sub></i> (g cm <sup>-3</sup> )                                                                          | 2.376                                                                                                                                                                                                                                                                                                                                                                                                      | 2.469         | 2.515         | 2.537         | 2.611         |
| $\mu$ /mm <sup>-1</sup>                                                                                             | 4.821                                                                                                                                                                                                                                                                                                                                                                                                      | 5.893         | 6.253         | 6.684         | 7.562         |
| <i>F</i> (000)                                                                                                      | 1544                                                                                                                                                                                                                                                                                                                                                                                                       | 1568          | 1576          | 1584          | 1600          |
| Reflections collected/unique                                                                                        | 7958/2101                                                                                                                                                                                                                                                                                                                                                                                                  | 7791/2060     | 7618/2042     | 7571/2033     | 6495/2008     |
| Data/restraints/parameters                                                                                          | 2101/0/160                                                                                                                                                                                                                                                                                                                                                                                                 | 2060/0/160    | 2042/0/160    | 2033/0/160    | 2008/0/160    |
| GOF( <i>F</i> <sup>2</sup> )                                                                                        | 1.029                                                                                                                                                                                                                                                                                                                                                                                                      | 1.268         | 1.095         | 1.155         | 1.166         |
| <i>R</i> <sub>1</sub> <sup><i>a</i></sup> / <i>wR</i> <sub>2</sub> <sup><i>b</i></sup> [ <i>I</i> > 2σ( <i>I</i> )] | 0.0189/0.0509                                                                                                                                                                                                                                                                                                                                                                                              | 0.0225/0.0559 | 0.0206/0.0528 | 0.0224/0.0580 | 0.0215/0.0531 |
| <i>R</i> <sub>1</sub> <sup><i>a</i></sup> / <i>wR</i> <sub>2</sub> <sup><i>b</i></sup> (all data)                   | 0.0191/0.0511                                                                                                                                                                                                                                                                                                                                                                                              | 0.0227/0.0560 | 0.0210/0.0530 | 0.0225/0.0580 | 0.0221/0.0533 |

$$^a R_1 = \sum \left| \frac{|F_o| - |F_c|}{|F_o|} \right| / \sum \left| \frac{|F_o|}{|F_o|} \right| \quad ^b wR_2 = \left\{ \frac{\sum [w(F_o^2 - F_c^2)]}{\sum [w(F_o^2)]} \right\}^{1/2}$$

**Table S2** Selected bond lengths (Å) for **1–5**<sup>a</sup>

|              | <b>1</b> | <b>2</b> | <b>3</b> | <b>4</b> | <b>5</b> |
|--------------|----------|----------|----------|----------|----------|
| Ln(1)-O(8)   | 2.443(2) | 2.398(3) | 2.390(3) | 2.373(3) | 2.350(3) |
| Ln(1)-O(7)   | 2.462(3) | 2.418(3) | 2.400(3) | 2.388(4) | 2.356(3) |
| Ln(1)-O(1)#1 | 2.469(2) | 2.426(3) | 2.416(3) | 2.400(3) | 2.377(3) |
| Ln(1)-O(5)   | 2.480(2) | 2.440(3) | 2.431(3) | 2.419(3) | 2.402(3) |
| Ln(1)-O(6)#2 | 2.494(2) | 2.458(3) | 2.448(3) | 2.439(3) | 2.414(3) |
| Ln(1)-O(4)   | 2.508(2) | 2.474(3) | 2.465(3) | 2.454(3) | 2.430(3) |
| Ln(1)-O(3)   | 2.528(2) | 2.482(3) | 2.476(3) | 2.455(3) | 2.433(3) |
| Ln(1)-O(2)#3 | 2.537(2) | 2.484(3) | 2.478(3) | 2.457(3) | 2.424(3) |
| Ln(1)-O(1)#3 | 2.631(2) | 2.618(3) | 2.605(3) | 2.616(3) | 2.605(3) |

<sup>a</sup> Symmetry codes: #1  $x, y+1, z$  #2  $-x, -y+2, -z+1$  #3  $-x+1/2, -y+3/2, -z+1$

**Table S3** Hydrogen bond lengths (Å) and bond angles (°) in **1**<sup>a</sup>

| Compound <b>1</b>   |        |          |          |        |
|---------------------|--------|----------|----------|--------|
| D-H...A             | d(D-H) | d(H...A) | d(D...A) | <(DHA) |
| O(9)-H(5W)...O(4)#4 | 0.85   | 1.97     | 2.759(3) | 154.7  |
| O(8)-H(4W)...O(3)#5 | 0.85   | 1.92     | 2.760(3) | 169.6  |
| O(8)-H(3W)...O(2)#5 | 0.85   | 2.38     | 2.918(4) | 121.4  |
| O(8)-H(3W)...O(6)#6 | 0.85   | 2.29     | 3.074(4) | 154.1  |
| O(7)-H(2W)...O(5)   | 0.85   | 2.54     | 3.003(4) | 115.7  |
| O(7)-H(1W)...O(9)#7 | 0.85   | 2.32     | 2.744(3) | 111.3  |

<sup>a</sup> Symmetry codes: #4  $-x+1, y-1, -z+1/2$  #5  $-x+1/2, -y+5/2, -z+1$   
#6  $-x, -y+3, -z+1$  #7  $x-1, y+1, z$

**Scheme 1.** Coordination modes of tdc and oxalate ligands.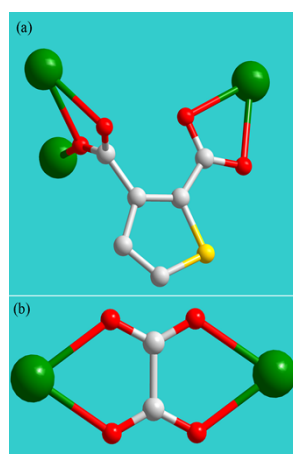

Fig. S1 View of the 3D supramolecular structure of **1**. The intra- and intermolecule hydrogen bonds are shown in yellow and blue colours, respectively. C–H $\cdots$  $\pi$  stacking interactions are shown in pink colour.

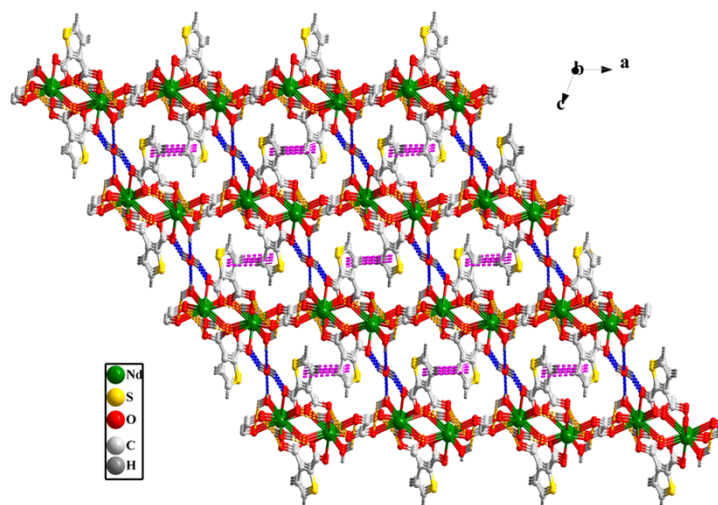

Fig. S2 PXRD patterns of as-synthesized **1-5** and simulated **1**.

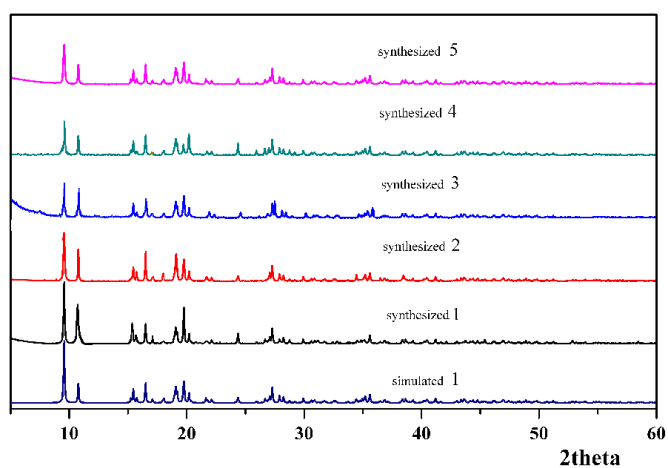

Fig. S3 TG curve of **1-5**.

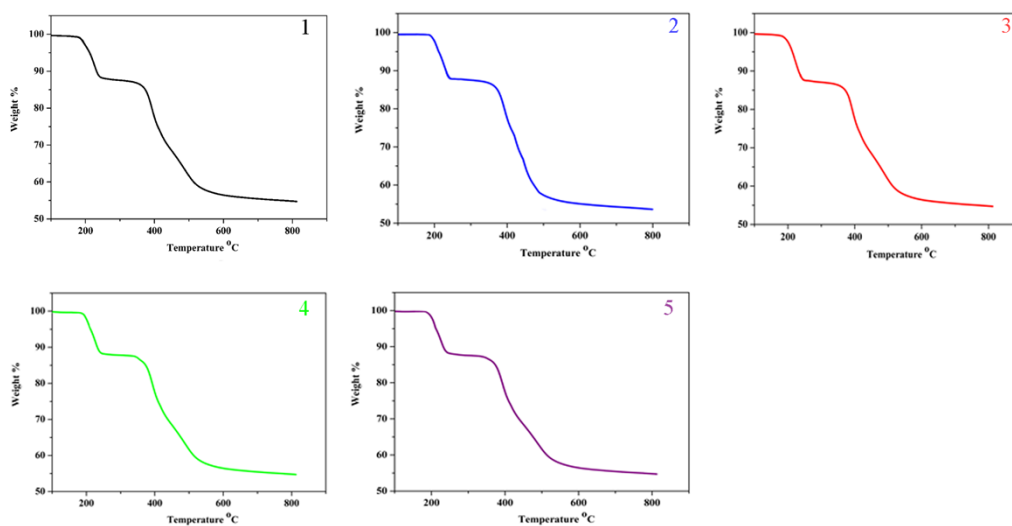

Fig. S4 PXRD patterns of fresh dehydrated 1, recovered 1 after run 4( activated) and synthesized 1.

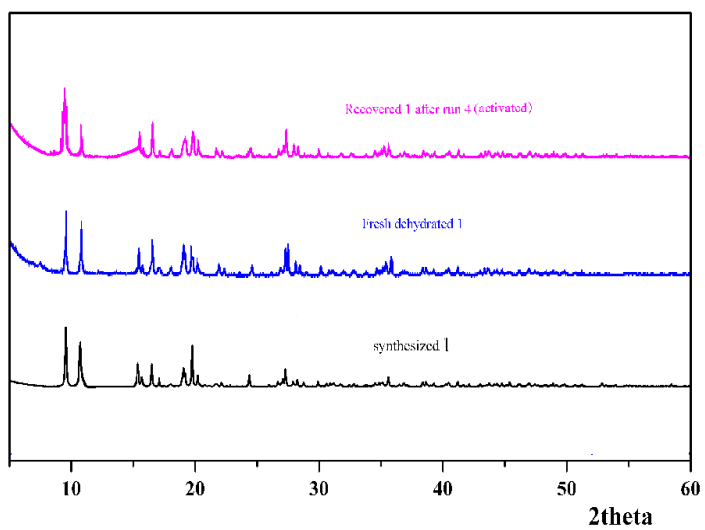

Fig. S5 <sup>1</sup>H NMR of (Dimethoxymethyl)benzene

<sup>1</sup>H NMR (400 MHz, CHCl<sub>3</sub>): δ 7.41-7.35 (m, 5H), 5.43 (s, 1H), 3.32 (s, 6H).

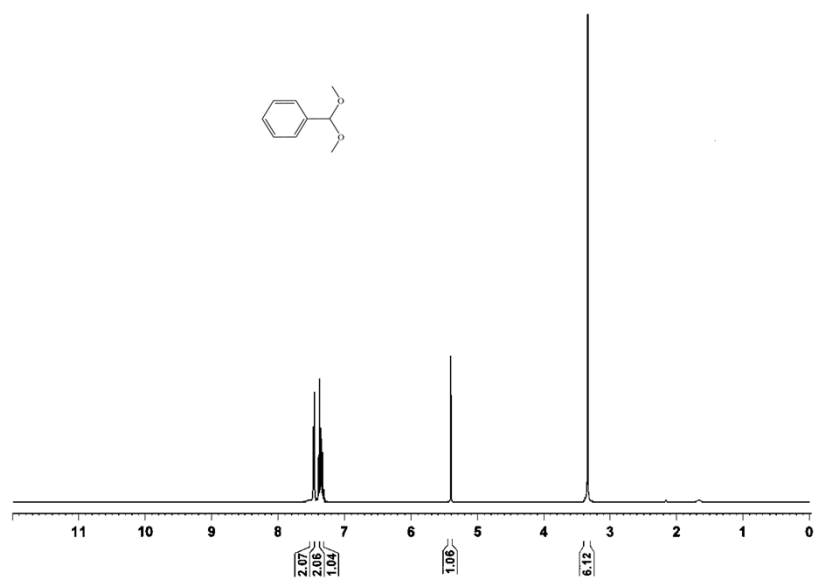

Supplement: c4ce01734j1.pdf [file c4ce01734j1.pdf]
